# Supplementary material
Source: PubMed Central journal article supplement (PMC11028209)
Supplement: 262_2019_2387_MOESM1_ESM.pdf [file 262_2019_2387_MOESM1_ESM.pdf]

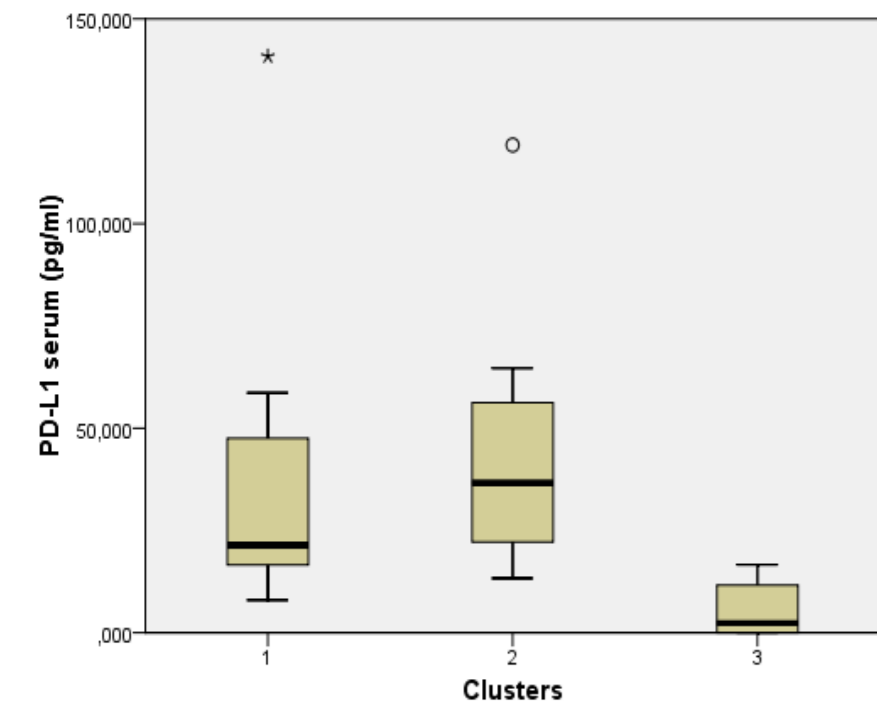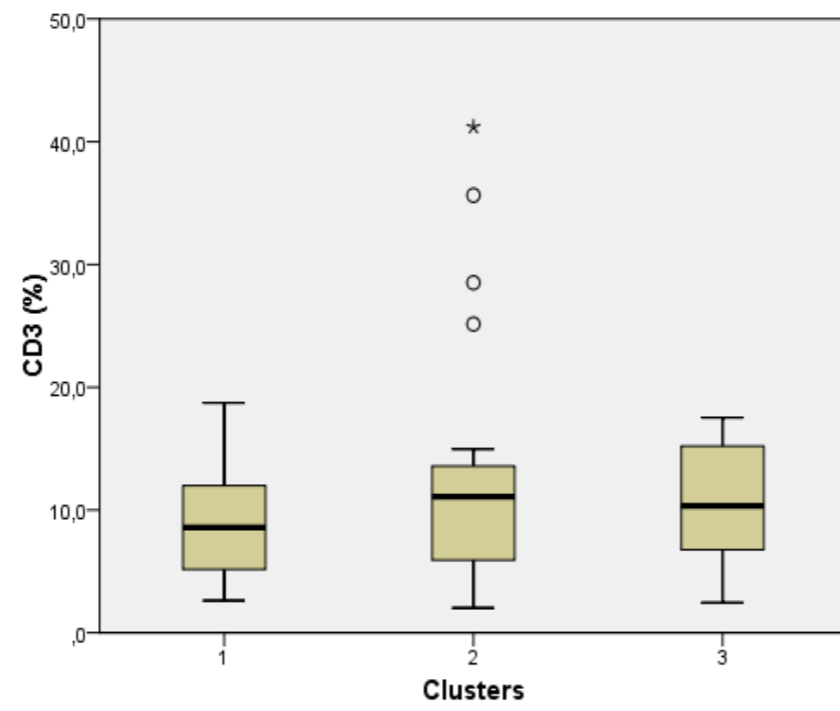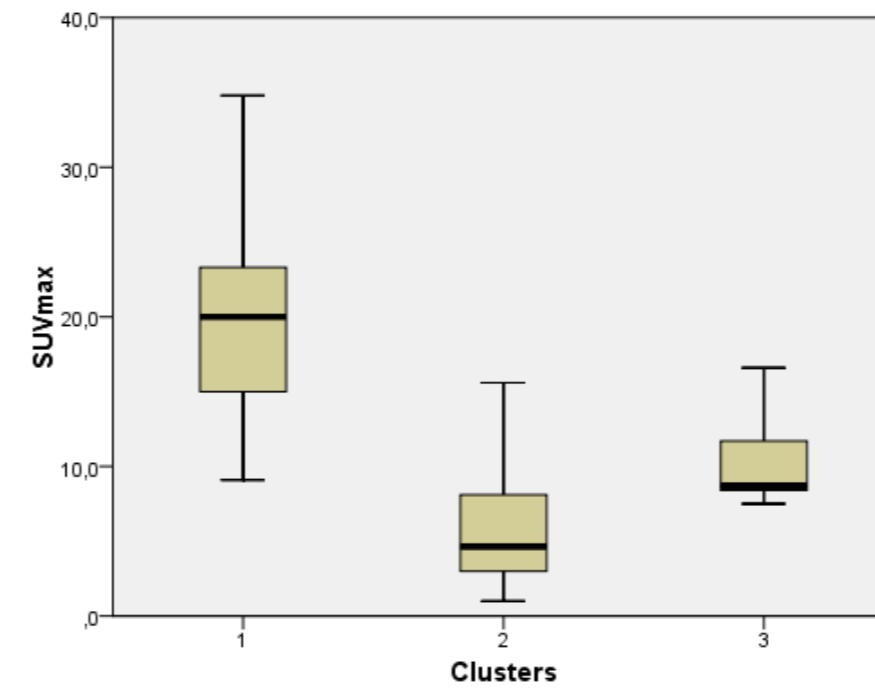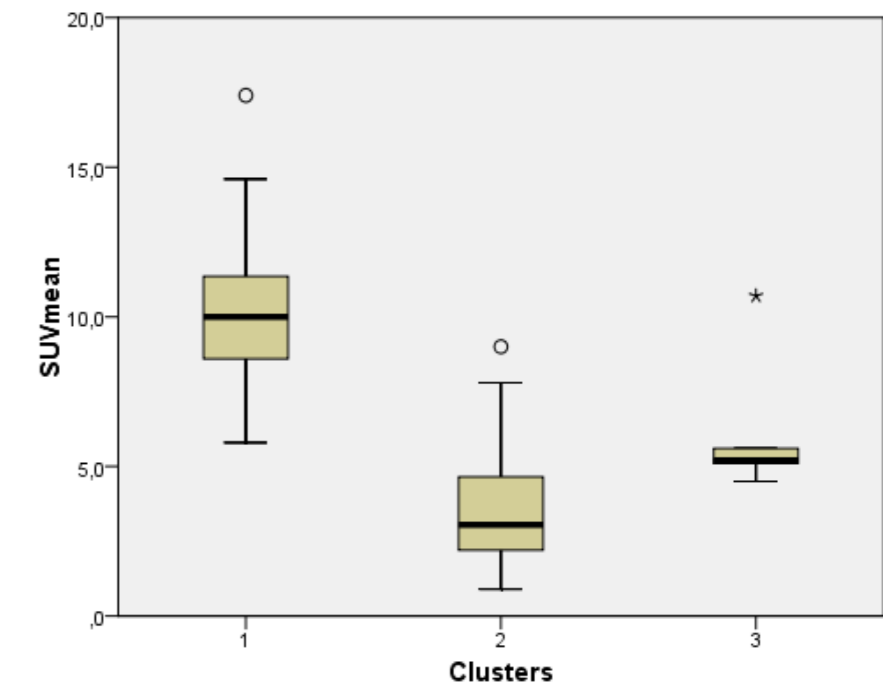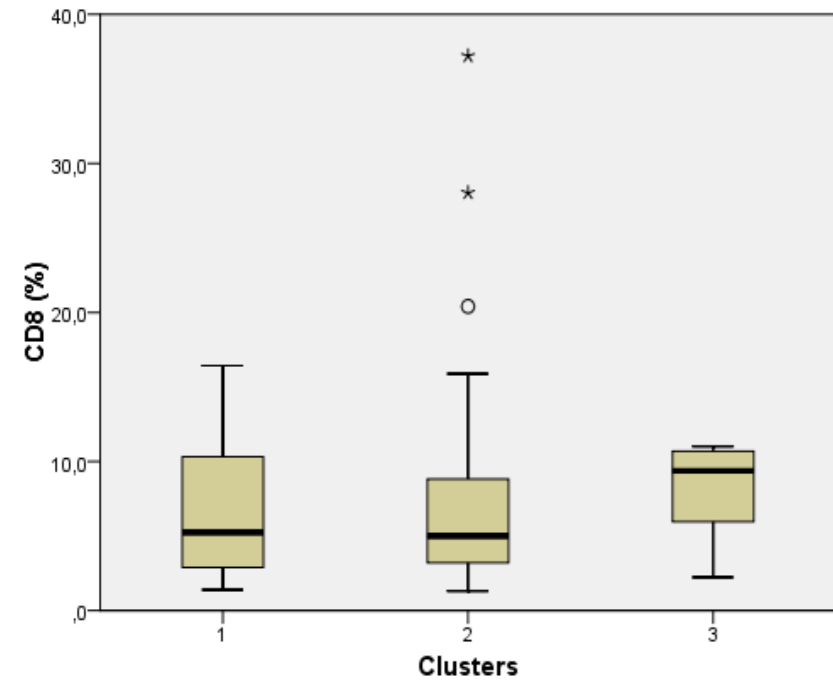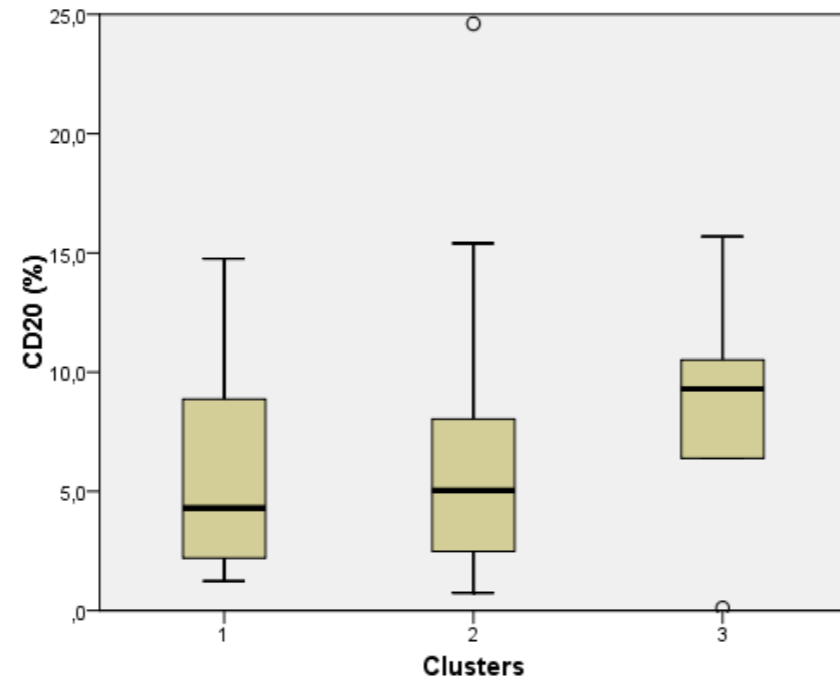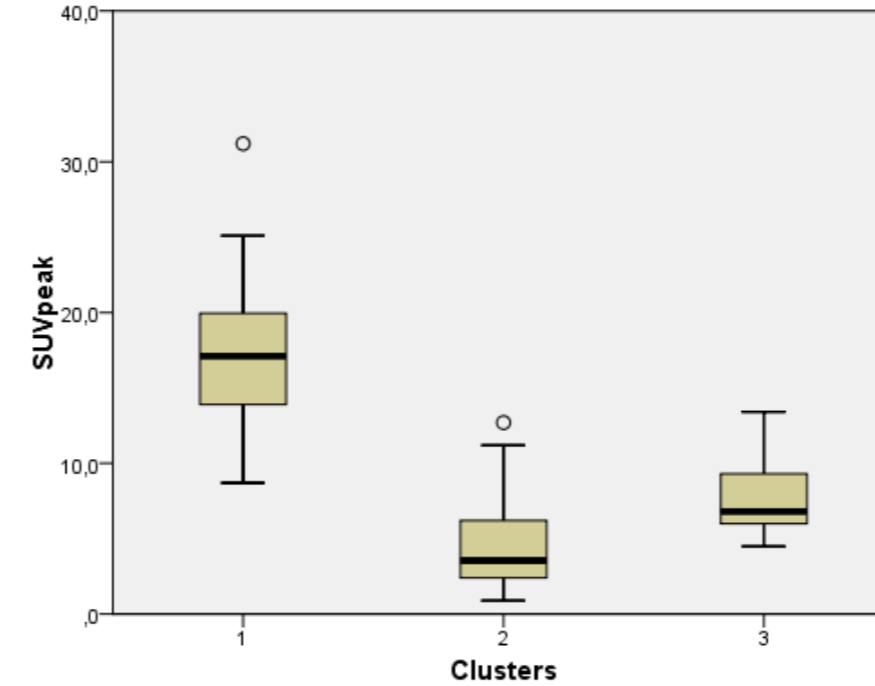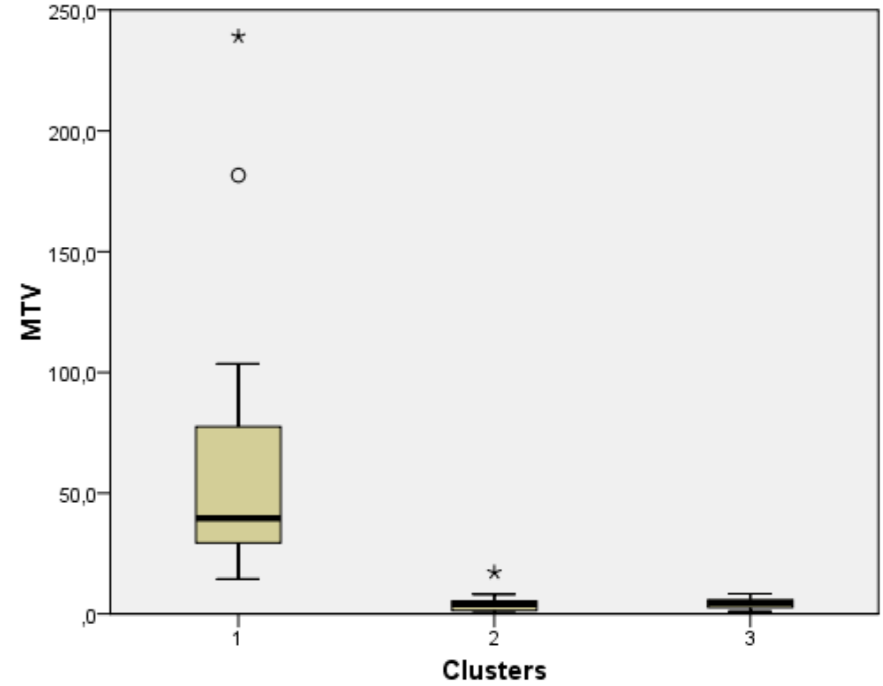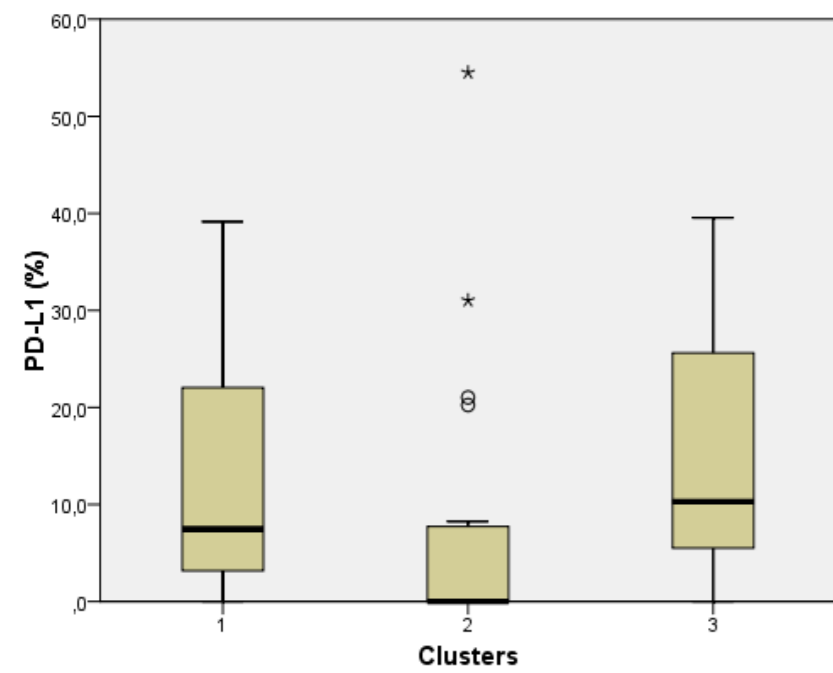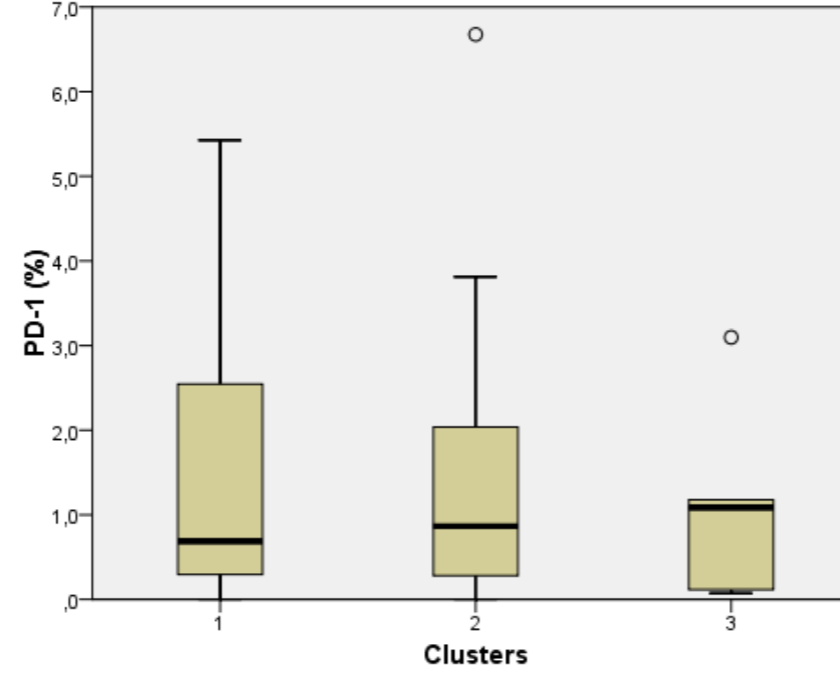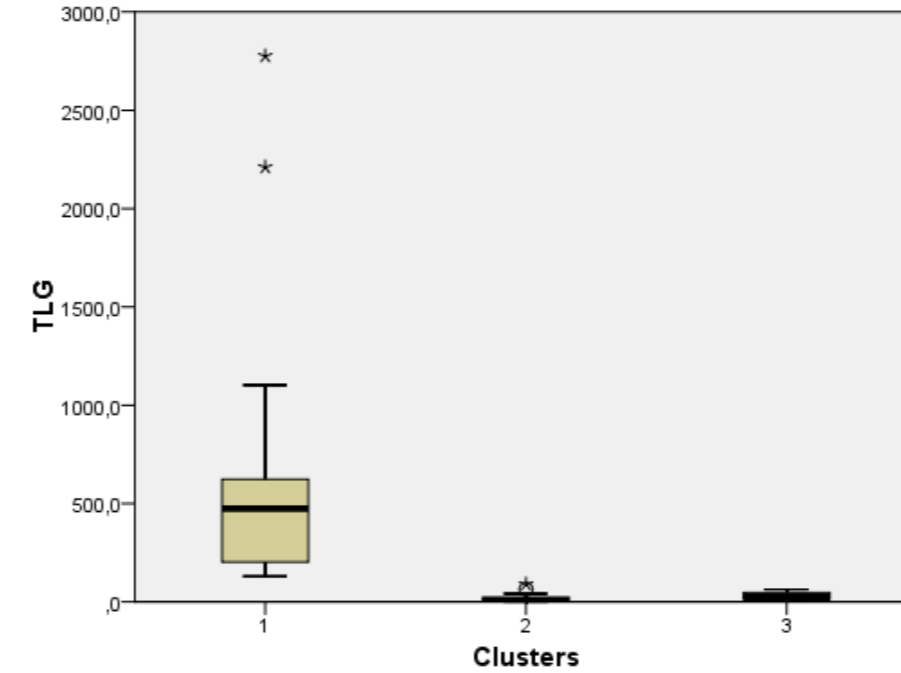

**Supplementary figure 1:** Graphical box-plots with medians for all tissue and circulating variables distribution, as well as medians for metabolic parameters on FDG PET according to the different clusters obtained from the primary cluster-3 model.
